# Supplementary material for: Collaborative review of pilot projects to inform policy: A methodological remedy for pilotitis?
Source: PubMed Central journal article supplement (PMC2503987; doi:10.1186/1743-8462-5-17), 2008-07-19
Supplement: 1743-8462-5-17-S2.pdf [file 1743-8462-5-17-S2.pdf]

- Interviews were conducted to confirm and elucidate the findings from the systematic review
- Interviews sought a variety of perspectives, including those of:
  - Officers and managers in relevant federal and state government departments involved in implementation and support of project
  - Managers and implementers of each exemplar pilot project
  - Staff employed in the project
  - Associated organisations
  - Consumers
  - Other professional groups.

Box 2. Subsequent interviews with stakeholders associated with exemplary pilot projects and projects which have become sustainable services through mainstream funding.
